# Supplementary material for: The Clinical Influence of Autophagy-Associated Proteins on Human Lung Cancer
Source: Hindawi journal article supplement (doi:10.1155/2018/8314963), 2018-01-01
Supplement: f1 [file 8314963.f1.pdf]

**Table S1.** Sequences of primers for LC3A

| <b>PCR</b>            | <b>Primer name</b> | <b>Sequence (5'-3')</b>      |
|-----------------------|--------------------|------------------------------|
| Real-time RT-PCR      | LC3A-F             | CCTGGACAAGACCAAGGTTTTTG      |
|                       | LC3A-R             | GTCTTTCTCCTGCTCGTAGATG       |
|                       | GAPDH-F            | GACAGTCAGCCGCATCTTCT         |
|                       | GAPDH-R            | TTAAAAGCAGCCCTGGTGAC         |
| MSP in exon 3         | MSP-F              | ATCGGTTTTTTAAGTAGCGGC        |
|                       | MSP-R              | ACCTAACGTCACGAACTAACGT       |
|                       | UMSP-F             | AGATTGGTTTTTTAAGTAGTGGTGG    |
|                       | UMSP-R             | AACCTAACATCACAAACTAACATC     |
| BS in promoter region | BS-F               | TTGTTATTTTTGATTGTATGGAAGTTAG |
|                       | BS-R               | CCTAAAACCAATCCTTCCACTATAC    |
| BS in exon 4          | BS-F               | TTAGTATAGTATGGTGAGTGTGTTTA   |
|                       | BS-R               | CCCCTACTACTAACTCAAAAACC      |

BS: bisulfite sequencing; MSP: methylation-specific-PCR;  
UMSP: unmethylation-specific-PCR

**Table S2.** Antibodies used for immunohistochemistry (IHC)

| <b>Name</b> | <b>Host</b> | <b>Company</b>                               | <b>Dilution</b> |
|-------------|-------------|----------------------------------------------|-----------------|
| Atg5        | mouse       | Santa Cruz Biotechnology, Santa Cruz, CA USA | 1:100           |
| Beclin-1    | rabbit      | Abcam                                        | 1:100           |
| LC3A        | rabbit      | Sigma-Aldrich                                | 1.25            |
| LC3B        | rabbit      | Novus Biologicals                            | 1:1000          |
| p62         | rabbit      | Novus Biologicals                            | 1:1000          |

**Table S3.** Correlation between LC3A methylation and clinicopathological parameters in primary lung tumor

|               |        | LC3A         |            | p-value |
|---------------|--------|--------------|------------|---------|
|               |        | unmethylated | methylated |         |
| <b>Type</b>   | ADC    | 11           | 14         | 0.275   |
|               | SCC    | 9            | 22         |         |
| <b>Gender</b> | Male   | 18           | 28         | 0.749   |
|               | Female | 4            | 9          |         |
| <b>Age</b>    | < 65   | 14           | 24         | 1.000   |
|               | ≥ 65   | 8            | 13         |         |
| <b>pN</b>     | 0-1    | 10           | 17         | 1.000   |
|               | >1     | 11           | 18         |         |
| <b>pT</b>     | 0-1    | 18           | 30         | 0.722   |
|               | >1     | 4            | 5          |         |
| <b>Grade</b>  | 1-2    | 14           | 20         | 0.589   |
|               | >2     | 8            | 17         |         |

ADC: adenocarcinoma; SCC: squamous cell carcinoma.

**Table S4.** Correlation between p62 and clinicopathological data

|               |        | p62 |      | p-value |
|---------------|--------|-----|------|---------|
|               |        | low | high |         |
| <b>Type</b>   | ADC    | 16  | 6    | 0.329   |
|               | SCC    | 52  | 35   |         |
| <b>Gender</b> | Male   | 62  | 40   | 0.405   |
|               | Female | 12  | 4    |         |
| <b>pT</b>     | 0-1    | 54  | 37   | 0.182   |
|               | >1     | 20  | 7    |         |
| <b>pN</b>     | 0-1    | 68  | 35   | 0.084   |
|               | >1     | 6   | 9    |         |
| <b>Grade</b>  | 1-2    | 42  | 30   | 0.246   |
|               | >2     | 32  | 14   |         |

**Table S5.** Correlation between Atg5 and clinicopathological data

|               |        | <b>Atg5</b> |      | <b>p-value</b> |
|---------------|--------|-------------|------|----------------|
|               |        | low         | high |                |
| <b>Type</b>   | ADC    | 17          | 22   | 0.235          |
|               | SCC    | 38          | 30   |                |
| <b>Gender</b> | Male   | 49          | 57   | 0.873          |
|               | Female | 12          | 13   |                |
| <b>Age</b>    | ≤ 65   | 37          | 47   | 0.313          |
|               | > 65   | 23          | 20   |                |
| <b>pT</b>     | 0-1    | 16          | 21   | 0.633          |
|               | ≥ 2    | 45          | 49   |                |
| <b>pN</b>     | 0-1    | 16          | 21   | 0.633          |
|               | >1     | 45          | 49   |                |
| <b>pM</b>     | 0-1    | 53          | 67   | 0.112          |
|               | >1     | 8           | 3    |                |
| <b>Grade</b>  | 1-2    | 26          | 41   | 0.069          |
|               | >2     | 35          | 29   |                |

ADC, adenocarcinoma; SCC, squamous cell carcinoma.
